# Supplementary material for: A facile synthesis approach to micro–macroporous carbon from cotton and its application in the lithium–sulfur battery
Source: Royal Society of Chemistry journal article supplement (doi:10.1039/c4ra12260g), 2014-11-24
Supplement: c4ra12260g1.pdf [file c4ra12260g1.pdf]

## Electronic Supplementary Material

### Large-scale production of hierarchically micro-macroporous carbon from cotton and its application in the lithium-sulfur battery

Hongqiang Wang<sup>a</sup>, Zhixin Chen<sup>c</sup>, Hua Kun Liu<sup>a</sup>, Zaiping Guo<sup>\*a,b,c</sup>

<sup>a</sup> Institute for Superconducting & Electronic Materials, University of Wollongong, NSW 2522, Australia

<sup>b</sup> Hubei Collaborative Innovation Center for Advanced Organic Chemical Materials, College of Chemistry and Chemical Engineering, Hubei University, Wuhan 430062, P.R. China

<sup>c</sup> School of Mechanical, Materials & Mechatronics Engineering, University of Wollongong, NSW 2500, Australia

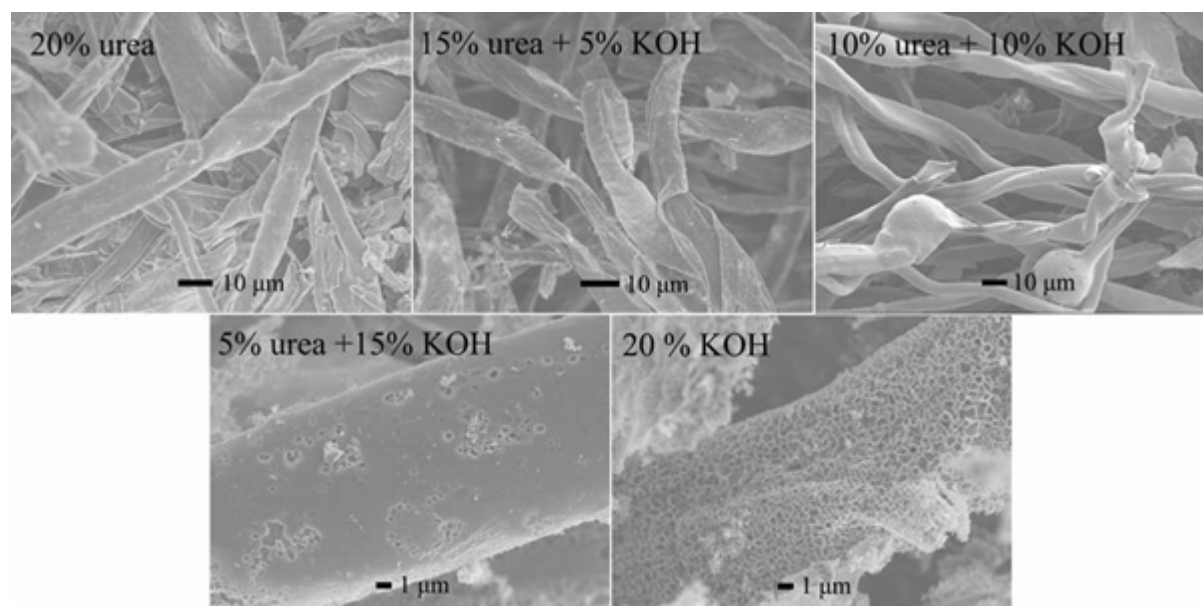

Fig. S1 SEM images of porous carbon derived from cotton under different treatment conditions.

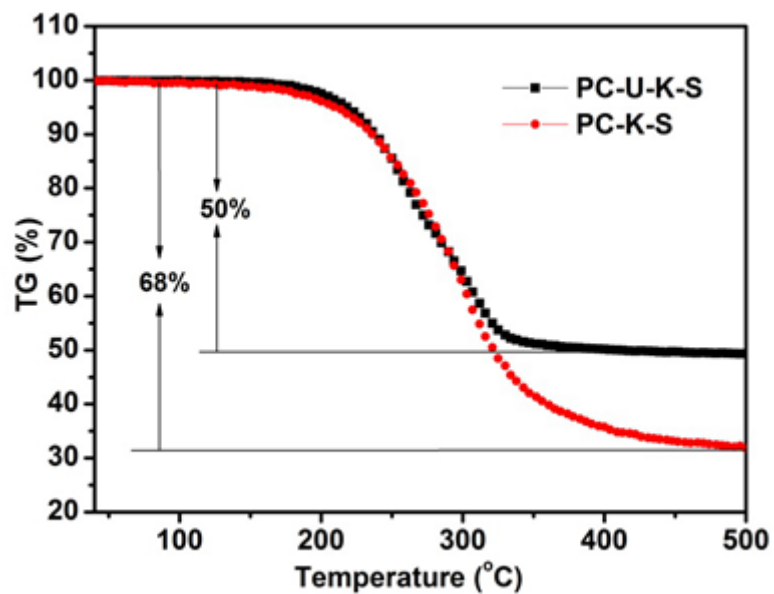

Fig. S2 TG curves of the PC-U-K-S and PC-K-S composites under argon atmosphere.

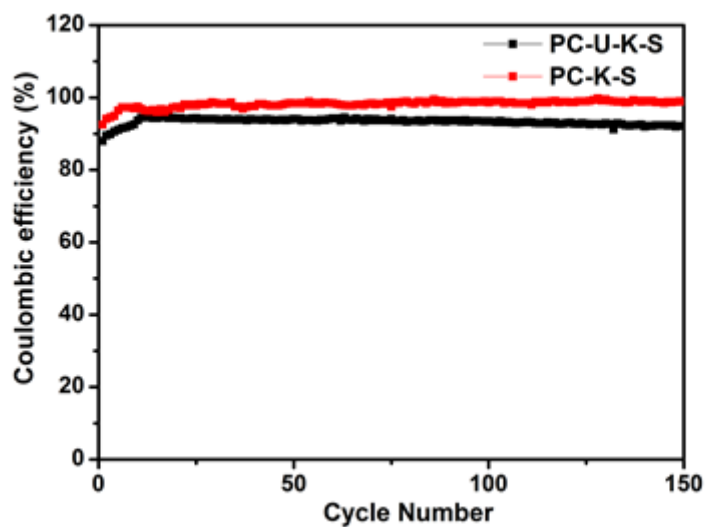

Fig. S3 The efficiency of PC-U-K-S and PC-K-S cells as function of cycle number.

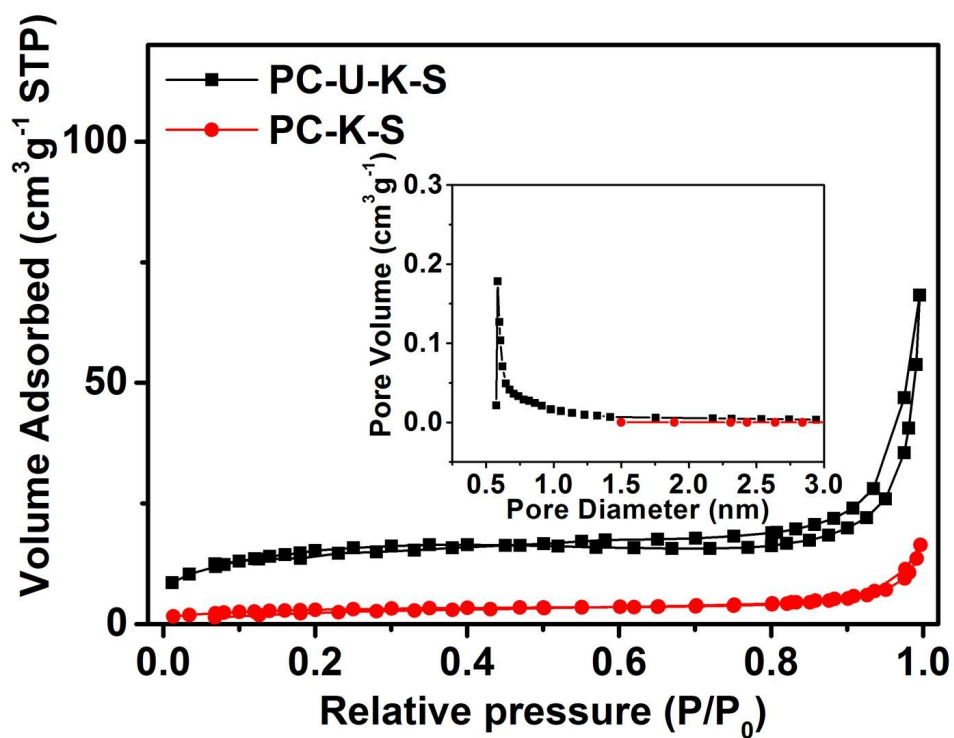

Fig. S4 N<sub>2</sub> sorption isotherms of the PC-U-K-S and PC-K-S composites. Inset shows the pore-size distributions for the composites.

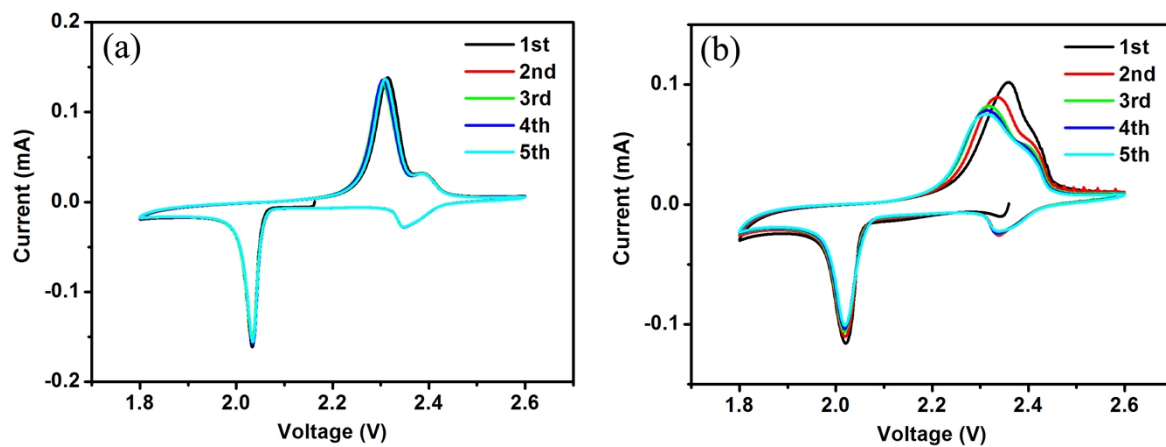

Fig. S5 CV curves of the cell with (a) PC-K-S and (b) PC-U-K-S composites after cycles.

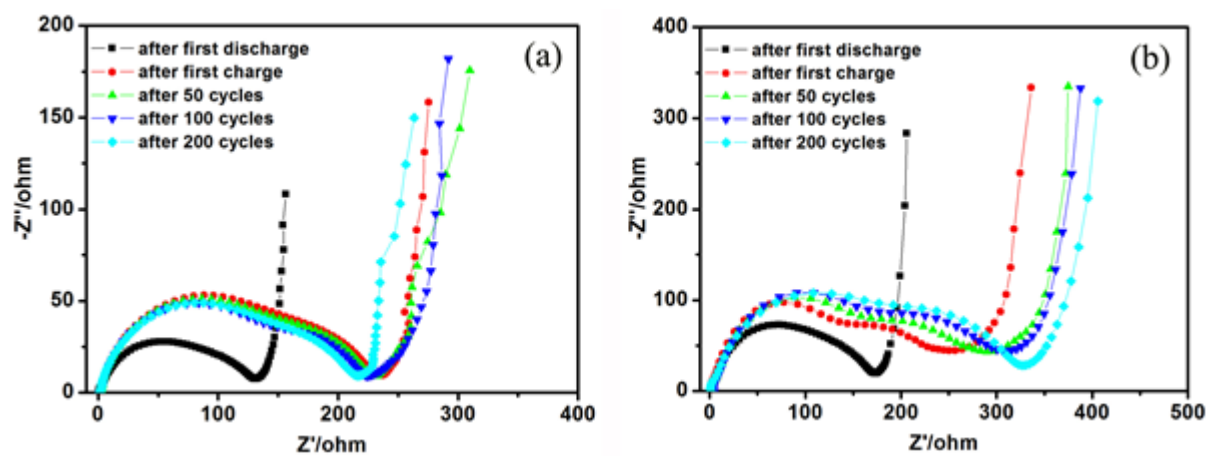

Fig. S6 EIS spectra of the cell with (a) PC-K-S and (b) PC-U-K-S composites after cycles.
